# Supplementary material
Source: PubMed Central journal article supplement (PMC5826867)

**Figure S1:** Heat map of normalized metabolite values. Positive values are shown in shades of red while shades of blue represent negative values. Metabolites are grouped according to enriched super-pathways (Energy, Nucleotide, and Amino Acid). Metabolites assigned to Other Pathways represent metabolites that are significantly different between low-risk and intermediate/high-risk PE groups but the pathways these are assigned to were not enriched.

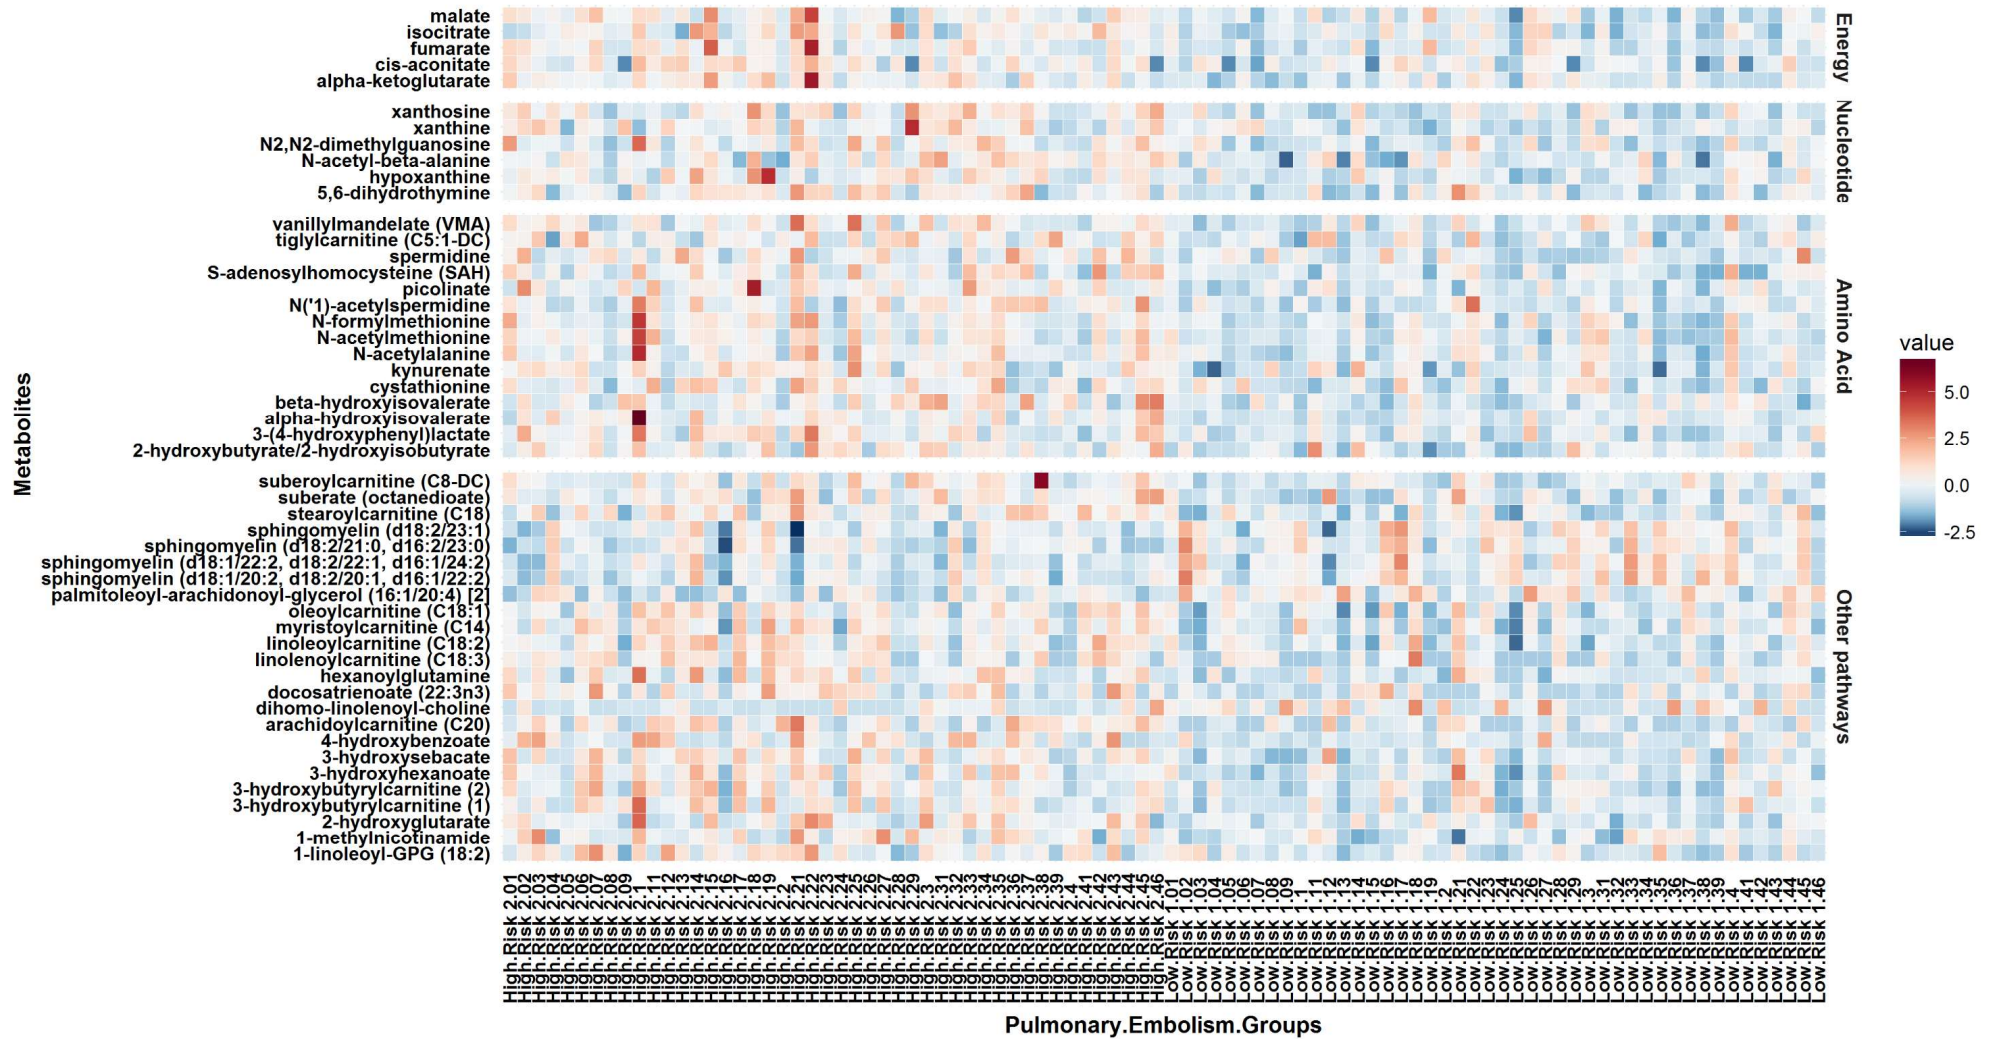

Supplement: NIHMS932145-supplement-Supp_FigS1.pdf [file NIHMS932145-supplement-Supp_FigS1.pdf]
