# Supplementary material
Source: PubMed Central journal article supplement (PMC5826867)
Supplement: NIHMS932145-supplement-Supp_FigS2.pdf [file NIHMS932145-supplement-Supp_FigS2.pdf]

**Figure S2:** Spearman correlation among metabolites identified as different between low-risk and intermediate/high-risk PE patients. Positive correlations are shown in shades of red while shades of blue represent negative correlations. Metabolites are grouped according to enriched super-pathways (Energy, Nucleotide, and Amino Acid). Metabolites assigned to Other Pathways represent metabolites that are significantly different between low-risk and intermediate/high-risk PE groups but the pathways these are assigned to were not identified as enriched.

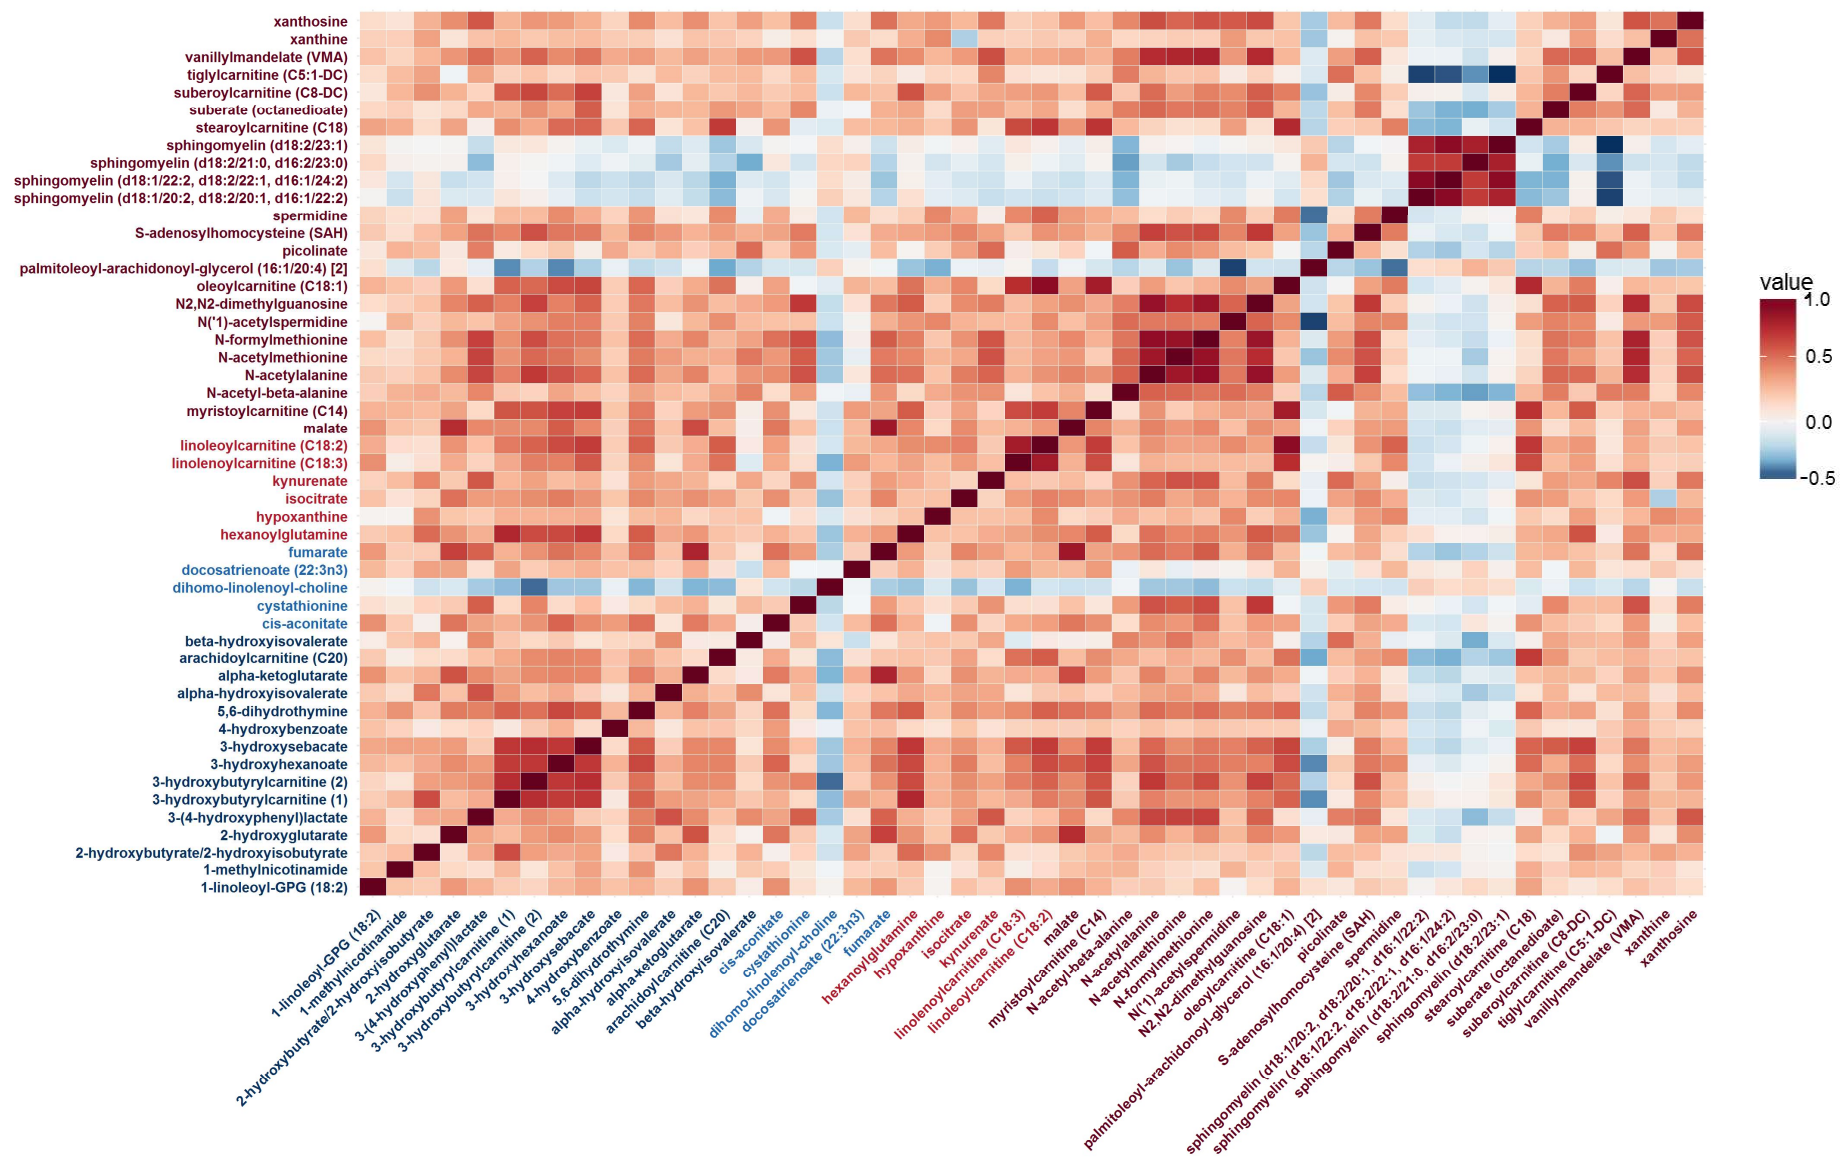

Super-pathways: **Energy** **Nucleotide** **Amino Acid** **Other pathways**
