# Supplementary material
Source: PubMed Central journal article supplement (PMC5826867)

**Figure S3:** Correlations between measured acyl carnitines among all 92 PE patients. The significance level of the acyl carnitines is indicated by the different colors: black indicates FDR-corrected p-values  $\leq 0.05$ , grey indicates FDR-corrected p-values  $\leq 0.2$ , and orange indicates FDR-corrected p-values  $> 0.2$

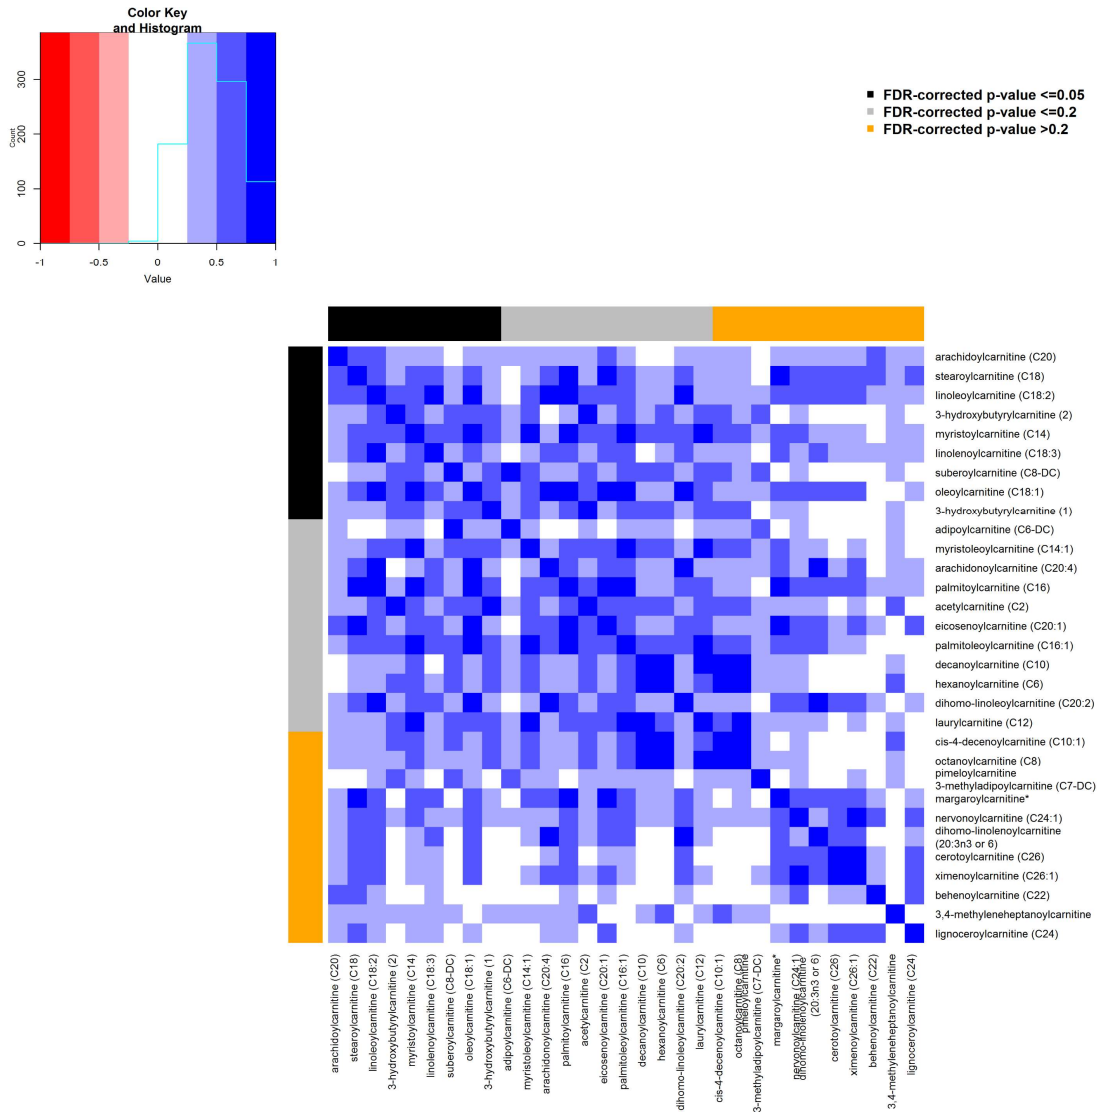

Supplement: NIHMS932145-supplement-Supp_FigS3.pdf [file NIHMS932145-supplement-Supp_FigS3.pdf]
